# Supplementary material for: A feasibility study of a WhatsApp-delivered Transtheoretical Model-based intervention to promote healthy eating habits for firefighters in Hong Kong: a cluster randomized controlled trial
Source: Springer Nature journal article supplement (doi:10.1186/s13063-020-04258-6), 2020-06-12
Supplement: MOESM2 [file 18078436]

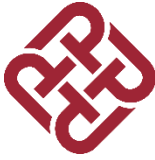

香港理工大學  
THE HONG KONG  
POLYTECHNIC UNIVERSITY

Appendix II

醫療及社會科學院  
Faculty of Health and Social Sciences

香港 九龍 紅磡  
Hung Hom Kowloon Hong Kong

### CONSENT TO PARTICIPATE

A feasibility study of using various channels to promote healthy eating habits for firefighters in Hong Kong: A cluster randomized controlled trial

I, \_\_\_\_\_ hereby consent to participate in the captioned research supervised by Dr. Kin Cheung and conducted by Ms. Ng Wing Man.

I understand that information obtained from this research may be used in future research and published. All the personal information will be coded and my right to privacy will be retained, i.e, my personal details will not be revealed.

The procedure as set out in the attached information sheet has been fully explained. I understand the benefits and risks involved. My participation in the study is voluntary.

I acknowledge that I have right to question any part of the procedure and can withdraw at any time without penalty of any kind.

Name of participant : \_\_\_\_\_

Signature of participant : \_\_\_\_\_

Name of researcher : \_\_\_\_\_ Ng Wing Man

Signature of researcher : \_\_\_\_\_

Date : \_\_\_\_\_
