# Supplementary material for: A feasibility study of a WhatsApp-delivered Transtheoretical Model-based intervention to promote healthy eating habits for firefighters in Hong Kong: a cluster randomized controlled trial
Source: Springer Nature journal article supplement (doi:10.1186/s13063-020-04258-6), 2020-06-12
Supplement: MOESM4 [file 18078436]

### Record of measurements

Name: \_\_\_\_\_

Reference number: \_\_\_\_\_

|                                                 | Baseline (T <sub>0</sub> ) | 3 months (T <sub>1</sub> ) | 6 months (T <sub>2</sub> ) |
|-------------------------------------------------|----------------------------|----------------------------|----------------------------|
| Date                                            |                            |                            |                            |
| Body height (cm)                                |                            |                            |                            |
| Body weight (kg)                                |                            |                            |                            |
| Body mass indexes (BMI)<br>(kg/m <sup>2</sup> ) |                            |                            |                            |
| Waist circumference (cm)                        |                            |                            |                            |
| Hip circumference (cm)                          |                            |                            |                            |
| Waist-to-hip ratios (WHR)                       |                            |                            |                            |

References:

| BMI (kg/m <sup>2</sup> ) | Asia        |
|--------------------------|-------------|
| Underweight              | < 18.5      |
| Normal                   | 18.5 – 22.9 |
| Overweight               | 23.0 – 24.9 |
| Moderately obese         | 25.0 – 29.9 |
| Severely obese           | ≥ 30.0      |

| WHR    | Asia (male) |
|--------|-------------|
| Normal | 0.90        |
